# Supplementary material
Source: PubMed Central journal article supplement (PMC3405690)
Supplement: psb-7-246-s01.pdf [file psb-7-246-s01.pdf]

Supplemental Figure 1: Secondary structure of 31 identified sorghum miRNAs. Mature miRNA sequences are shaded by red color

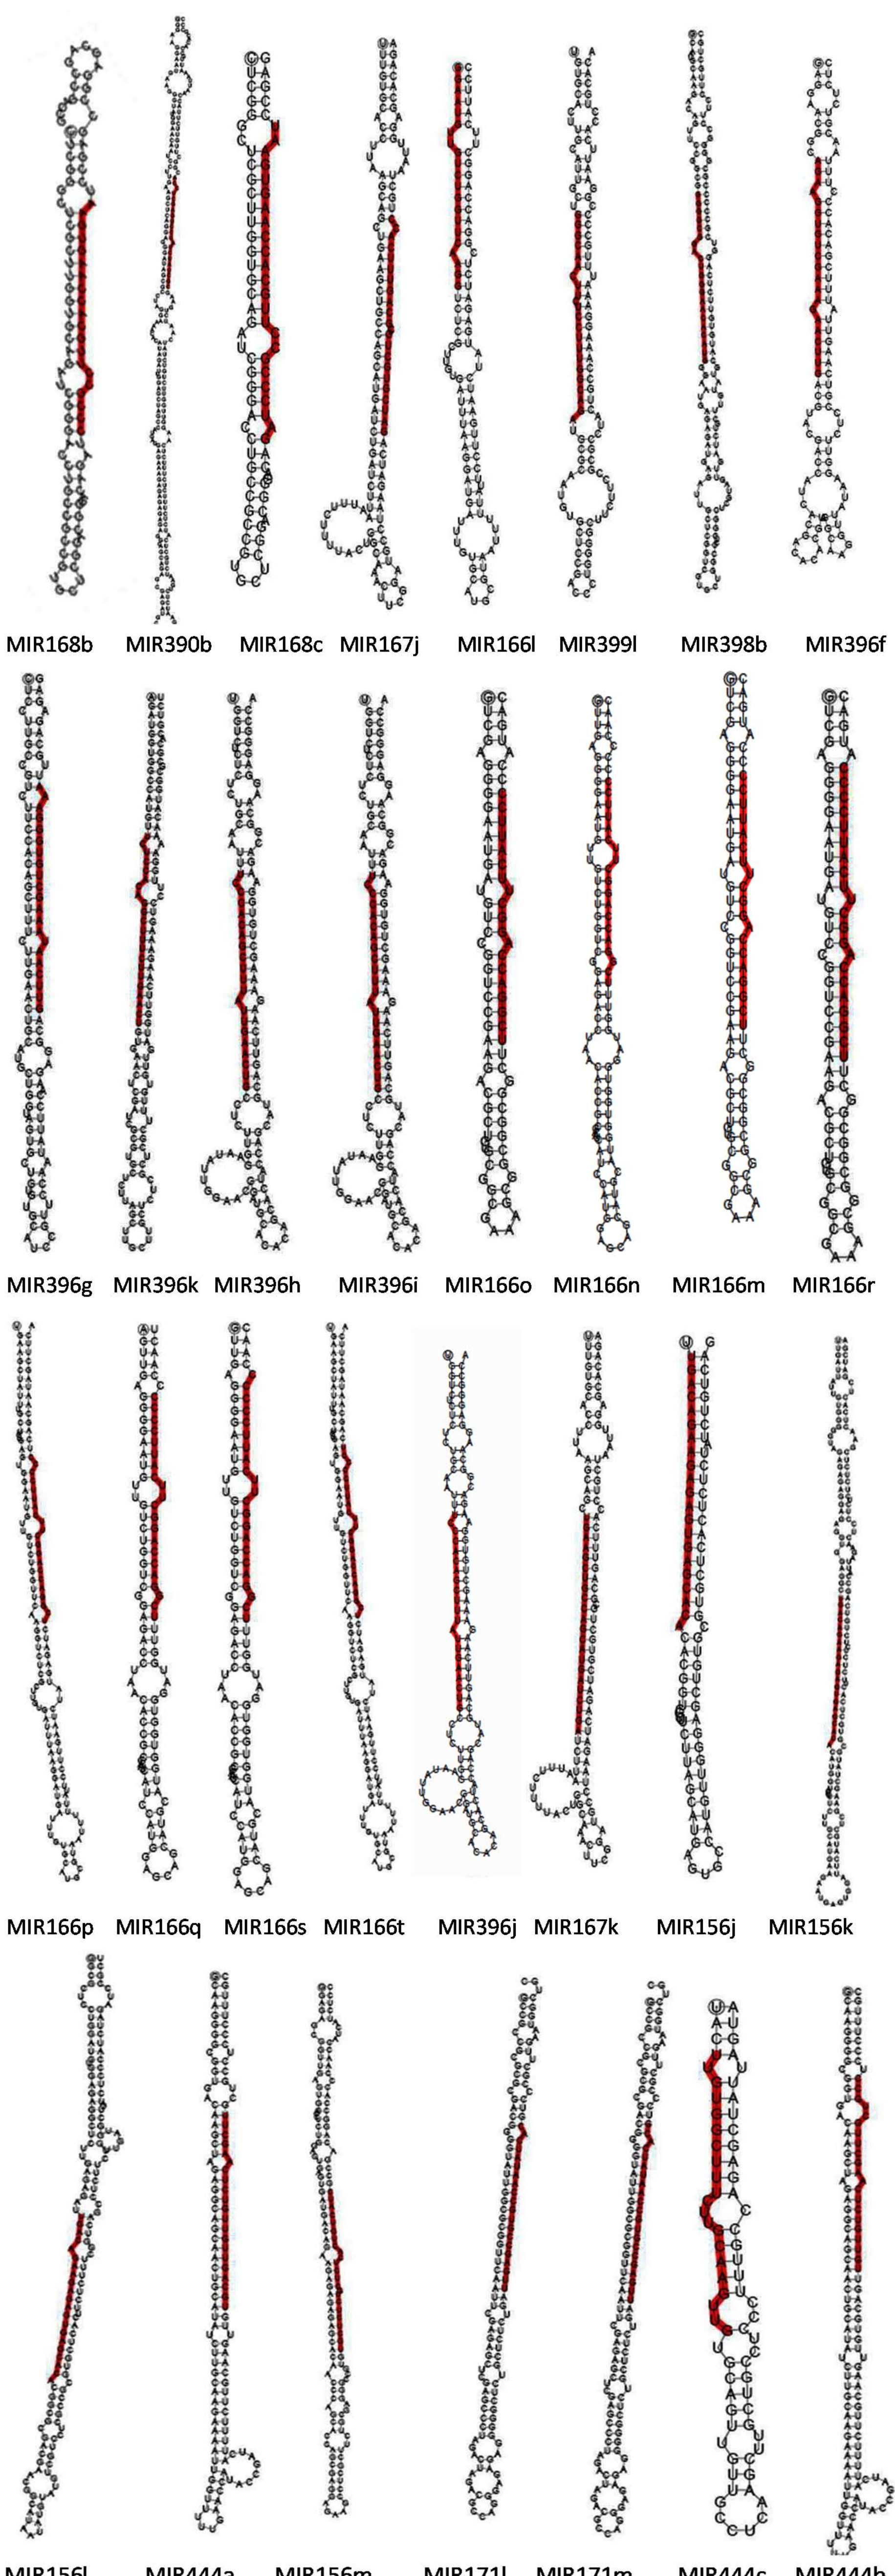

Supplemental Figure 2a-e: Sequence alignments of 31 putative microRNAs and their corresponding targets in sorghum

| miRNA Acc.                  | Target Acc.              | Expectation (E) | Target Accessibility (UPE) | Alignment                                                                                                              | Target Description                                                                                                                                                                                                                         | Inhibition  | (a) Multiplicity |
|-----------------------------|--------------------------|-----------------|----------------------------|------------------------------------------------------------------------------------------------------------------------|--------------------------------------------------------------------------------------------------------------------------------------------------------------------------------------------------------------------------------------------|-------------|------------------|
| <a href="#">sbi-MIR156j</a> | <a href="#">TC116488</a> | 1.0             | 12.95                      | miRNA 21 ACACGAGUGAGAGAAGACAGU 1<br>: : : : : : : : : : : : : : : : :<br>Target 27 UGUGCUCUCUCUCUCUCUGUCA 47           | similar to UniRef100_Q6YZE8 Cluster: Squamosa promoter-binding-like protein 16; n=1; Oryza sativa Japonica Group Rep: Squamosa promoter-binding-like protein 16 - Oryza sativa subsp. japonica (Rice), partial (16%)                       | Cleavage    | 1                |
| <a href="#">sbi-MIR156j</a> | <a href="#">AW747167</a> | 2.0             | 15.26                      | miRNA 20 CACGAGUGAGAGAAGACAGU 1<br>: : : : : : : : : : : : : : : : :<br>Target 516 AUGCUCUCUCUCUCUCUGUCA 535           | weakly similar to UniRef100_Q5U8L4 Cluster: SBP transcription factor; n=1; Gossypium hirsutum Rep: SBP transcription factor - Gossypium hirsutum (Upland cotton) (Gossypium mexicanum), partial (53%)                                      | Cleavage    | 1                |
| <a href="#">sbi-MIR156j</a> | <a href="#">TC118484</a> | 3.0             | 11.198                     | miRNA 20 CACGAGUGAGAGAAGACAGU 1<br>: : : : : : : : : : : : : : : : :<br>Target 447 CUGAUCCUCUCUCUCUGUCA 466            | similar to UniRef100_Q0IVD6 Cluster: Os10g0577600 protein; n=1; Oryza sativa Japonica Group Rep: Os10g0577600 protein - Oryza sativa subsp. japonica (Rice), partial (7%)                                                                  | Cleavage    | 1                |
| <a href="#">sbi-MIR156j</a> | <a href="#">EH409419</a> | 3.0             | 19.28                      | miRNA 20 CACGAGUGAGAGAAGACAGU 1<br>: : : : : : : : : : : : : : : : :<br>Target 98 CUCCUCAUUCUUUCUGUCA 117              | similar to UniRef100_Q10N00 Cluster: Hydrolase, alpha/beta fold family protein, expressed; n=1; Oryza sativa Japonica Group Rep: Hydrolase, alpha/beta fold family protein, expressed - Oryza sativa subsp. japonica (Rice), partial (37%) | Cleavage    | 1                |
| <a href="#">sbi-MIR156k</a> | <a href="#">TC116488</a> | 1.0             | 12.95                      | miRNA 21 ACACGAGUGAGAGAAGACAGU 1<br>: : : : : : : : : : : : : : : : :<br>Target 27 UGUGCUCUCUCUCUCUCUGUCA 47           | similar to UniRef100_Q6YZE8 Cluster: Squamosa promoter-binding-like protein 16; n=1; Oryza sativa Japonica Group Rep: Squamosa promoter-binding-like protein 16 - Oryza sativa subsp. japonica (Rice), partial (16%)                       | Cleavage    | 1                |
| <a href="#">sbi-MIR156k</a> | <a href="#">AW747167</a> | 2.0             | 15.26                      | miRNA 20 CACGAGUGAGAGAAGACAGU 1<br>: : : : : : : : : : ~ : : : : : : : : : :<br>Target 516 AUGCUCUCUCUCUCUCUGUCA 535   | weakly similar to UniRef100_Q5U8L4 Cluster: SBP transcription factor; n=1; Gossypium hirsutum Rep: SBP transcription factor - Gossypium hirsutum (Upland cotton) (Gossypium mexicanum), partial (53%)                                      | Cleavage    | 1                |
| <a href="#">sbi-MIR156k</a> | <a href="#">TC118484</a> | 3.0             | 11.198                     | miRNA 20 CACGAGUGAGAGAAGACAGU 1<br>: : : : ~ : : : : : : : : : : : : : : : : :<br>Target 447 CUGAUCCUCUCUCUCUGUCA 466  | similar to UniRef100_Q0IVD6 Cluster: Os10g0577600 protein; n=1; Oryza sativa Japonica Group Rep: Os10g0577600 protein - Oryza sativa subsp. japonica (Rice), partial (7%)                                                                  | Cleavage    | 1                |
| <a href="#">sbi-MIR156k</a> | <a href="#">EH409419</a> | 3.0             | 19.28                      | miRNA 20 CACGAGUGAGAGAAGACAGU 1<br>: : : : : : : : ~ : : : : : : : : : :<br>Target 98 CUCCUCAUUCUUUCUGUCA 117          | similar to UniRef100_Q10N00 Cluster: Hydrolase, alpha/beta fold family protein, expressed; n=1; Oryza sativa Japonica Group Rep: Hydrolase, alpha/beta fold family protein, expressed - Oryza sativa subsp. japonica (Rice), partial (37%) | Cleavage    | 1                |
| <a href="#">sbi-MIR156l</a> | <a href="#">TC116488</a> | 1.0             | 12.95                      | miRNA 21 ACACGAGUGAGAGAAGACAGU 1<br>: : : : ~ : : : : : : : : : ~ : : : : : : :<br>Target 27 UGUGCUCUCUCUCUCUCUGUCA 47 | similar to UniRef100_Q6YZE8 Cluster: Squamosa promoter-binding-like protein 16; n=1; Oryza sativa Japonica Group Rep: Squamosa promoter-binding-like protein 16 - Oryza sativa subsp. japonica (Rice), partial (16%)                       | Cleavage    | 1                |
| <a href="#">sbi-MIR156l</a> | <a href="#">AW747167</a> | 2.0             | 15.26                      | miRNA 20 CACGAGUGAGAGAAGACAGU 1<br>: : : : : : : : : : ~ : : : : : : : : : :<br>Target 516 AUGCUCUCUCUCUCUCUGUCA 535   | weakly similar to UniRef100_Q5U8L4 Cluster: SBP transcription factor; n=1; Gossypium hirsutum Rep: SBP transcription factor - Gossypium hirsutum (Upland cotton) (Gossypium mexicanum), partial (53%)                                      | Cleavage    | 1                |
| <a href="#">sbi-MIR156l</a> | <a href="#">EH409419</a> | 3.0             | 19.28                      | miRNA 20 CACGAGUGAGAGAAGACAGU 1<br>: : : : ~ : : : : : : : : : ~ : : : : : : :<br>Target 98 CUCCUCAUUCUUUCUGUCA 117    | similar to UniRef100_Q10N00 Cluster: Hydrolase, alpha/beta fold family protein, expressed; n=1; Oryza sativa Japonica Group Rep: Hydrolase, alpha/beta fold family protein, expressed - Oryza sativa subsp. japonica (Rice), partial (37%) | Cleavage    | 1                |
| <a href="#">sbi-MIR156m</a> | <a href="#">BM325400</a> | 3.0             | 15.484                     | miRNA 22 UACUGUCACUCUCUCUCUGU 1<br>: : : : : : : : : : : : : : : : :<br>Target 259 AUGACAGUGCAAACAGAGAGCA 280          | similar to UniRef100_Q6H8H7 Cluster: Phagocytosis and cell motility protein ELMO1-like; n=2; Oryza sativa Rep: Phagocytosis and cell motility protein ELMO1-like - Oryza sativa subsp. japonica (Rice), partial (36%)                      | Translation | 1                |
| <a href="#">sbi-MIR156m</a> | <a href="#">BG948102</a> | 3.0             | 21.848                     | miRNA 23 CUACUGUCACUCUCUCUCUGU 1<br>: : : : : : : : ~ : : : : : : : : : :<br>Target 380 GACGACGGUGAGAGAGAGGAGCU 402    | similar to UniRef100_Q0DKN3 Cluster: Os05g0153000 protein; n=1; Oryza sativa Japonica Group Rep: Os05g0153000 protein - Oryza sativa subsp. japonica (Rice), partial (7%)                                                                  | Translation | 1                |

| <b>miRNA Acc.</b>           | <b>Target Acc.</b>       | <b>Expectation (E)</b> | <b>Target Accessibility (UPE)</b> | <b>Alignment</b>                                                           | <b>Target Description</b>                                                                                                                                                                            | <b>Inhibition</b> | <b>(b) Multiplicity</b> |
|-----------------------------|--------------------------|------------------------|-----------------------------------|----------------------------------------------------------------------------|------------------------------------------------------------------------------------------------------------------------------------------------------------------------------------------------------|-------------------|-------------------------|
| <a href="#">sbi-MIR166l</a> | <a href="#">TC127624</a> | 0.0                    | 18.841                            | miRNA 21 GGAACUUGGUCUGUUGUAAGG 1<br>Target 1040 CCUUGAACCAAGCAACAUUC 1060  | weakly similar to UniRef100_Q9U6N6 Cluster: Calcium channel alpha-1 subunit; n=1; Bdelloura candida Rep: Calcium channel alpha-1 subunit - Bdelloura candida (Horseshoe crab flatworm), partial (7%) | Cleavage          | 1                       |
| <a href="#">sbi-MIR166l</a> | <a href="#">TC120618</a> | 3.0                    | 13.502                            | miRNA 21 GGAACUUGGUCUGUUGUAAGG 1<br>Target 98 UCUUAAACCAAGCAACAUUCU 118    | similar to UniRef100_Q0JM57 Cluster: Os01g0535400 protein; n=1; Oryza sativa Japonica Group Rep: Os01g0535400 protein - Oryza sativa subsp. japonica (Rice), partial (81%)                           | Translation       | 1                       |
| <a href="#">sbi-MIR166l</a> | <a href="#">TC122181</a> | 3.0                    | 22.359                            | miRNA 21 GGAACUUGGUCUGUUGUAAGG 1<br>Target 136 UCUUGACCGGGACGACAUUC 156    | weakly similar to UniRef100_Q86QQ1 Cluster: IR2; n=1; Schistosoma japonicum Rep: IR2 - Schistosoma japonicum (Blood fluke), partial (14%)                                                            | Cleavage          | 1                       |
| <a href="#">sbi-MIR166p</a> | <a href="#">TC127624</a> | 0.0                    | 22.989                            | miRNA 21 CCCC UUACUUCGGACCAGGCU 1<br>Target 955 GGGGAAUGAAGCCUGGUCCGA 975  | weakly similar to UniRef100_Q9U6N6 Cluster: Calcium channel alpha-1 subunit; n=1; Bdelloura candida Rep: Calcium channel alpha-1 subunit - Bdelloura candida (Horseshoe crab flatworm), partial (7%) | Cleavage          | 1                       |
| <a href="#">sbi-MIR166q</a> | <a href="#">TC127624</a> | 0.0                    | 22.989                            | miRNA 21 CCCC UUACUUCGGACCAGGCU 1<br>Target 955 GGGGAAUGAAGCCUGGUCCGA 975  | weakly similar to UniRef100_Q9U6N6 Cluster: Calcium channel alpha-1 subunit; n=1; Bdelloura candida Rep: Calcium channel alpha-1 subunit - Bdelloura candida (Horseshoe crab flatworm), partial (7%) | Cleavage          | 1                       |
| <a href="#">sbi-MIR166r</a> | <a href="#">TC127624</a> | 0.0                    | 22.989                            | miRNA 21 CCCC UUACUUCGGACCAGGCU 1<br>Target 955 GGGGAAUGAAGCCUGGUCCGA 975  | weakly similar to UniRef100_Q9U6N6 Cluster: Calcium channel alpha-1 subunit; n=1; Bdelloura candida Rep: Calcium channel alpha-1 subunit - Bdelloura candida (Horseshoe crab flatworm), partial (7%) | Cleavage          | 1                       |
| <a href="#">sbi-MIR166s</a> | <a href="#">TC127624</a> | 0.0                    | 22.989                            | miRNA 21 CCCC UUACUUCGGACCAGGCU 1<br>Target 955 GGGGAAUGAAGCCUGGUCCGA 975  | weakly similar to UniRef100_Q9U6N6 Cluster: Calcium channel alpha-1 subunit; n=1; Bdelloura candida Rep: Calcium channel alpha-1 subunit - Bdelloura candida (Horseshoe crab flatworm), partial (7%) | Cleavage          | 1                       |
| <a href="#">sbi-MIR166t</a> | <a href="#">TC127624</a> | 0.0                    | 22.989                            | miRNA 22 UCCC UUACUUCGGACCAGGCU 1<br>Target 954 AGGGGAAUGAAGCCUGGUCCGA 975 | weakly similar to UniRef100_Q9U6N6 Cluster: Calcium channel alpha-1 subunit; n=1; Bdelloura candida Rep: Calcium channel alpha-1 subunit - Bdelloura candida (Horseshoe crab flatworm), partial (7%) | Cleavage          | 1                       |

| miRNA Acc.                  | Target Acc.              | Expectation (E) | Target Accessibility (UPE) | Alignment                                                                                                | Target Description                                                                                                                                                                                                                                      | Inhibition | (c)<br>Multiplicity |
|-----------------------------|--------------------------|-----------------|----------------------------|----------------------------------------------------------------------------------------------------------|---------------------------------------------------------------------------------------------------------------------------------------------------------------------------------------------------------------------------------------------------------|------------|---------------------|
| <a href="#">sbi-MIR167k</a> | <a href="#">TC126582</a> | 3.0             | 22.004                     | miRNA 21 GUCUAGUACGACCGUCGAAGU 1<br>:::::::::: : : : : : : : : :<br>Target 522 CAGAUCAUCCUGG-AGCUUCA 541 | weakly similar to UniRef100_A7R7C3 Cluster: Chromosome undetermined scaffold_1678, whole genome shotgun sequence; n=1; Vitis vinifera Rep: Chromosome undetermined scaffold_1678, whole genome shotgun sequence - Vitis vinifera (Grape), partial (36%) | Cleavage   | 1                   |
| <a href="#">sbi-MIR1711</a> | <a href="#">TC111579</a> | 3.0             | 22.697                     | miRNA 20 CACUAUAACCGUGCCGAGUU 1<br>::::: : : : : : : : : : :<br>Target 455 GUGGUUGUGGCACGGUUCAA 474      | similar to UniRef100_A7QB21 Cluster: 6,7-dimethyl-8-ribityllumazine synthase; n=1; Vitis vinifera Rep: 6,7-dimethyl-8-ribityllumazine synthase - Vitis vinifera (Grape), partial (71%)                                                                  | Cleavage   | 1                   |
| <a href="#">sbi-MIR1711</a> | <a href="#">TC111734</a> | 3.0             | 22.697                     | miRNA 20 CACUAUAACCGUGCCGAGUU 1<br>::::: : : : : : : : : : :<br>Target 302 GUGGUUGUGGCACGGUUCAA 321      | similar to UniRef100_A7QB21 Cluster: 6,7-dimethyl-8-ribityllumazine synthase; n=1; Vitis vinifera Rep: 6,7-dimethyl-8-ribityllumazine synthase - Vitis vinifera (Grape), partial (82%)                                                                  | Cleavage   | 1                   |
| <a href="#">sbi-MIR171m</a> | <a href="#">TC111579</a> | 3.0             | 22.697                     | miRNA 20 CACUAUAACCGUGCCGAGUU 1<br>::::: : : : : : : : : : :<br>Target 455 GUGGUUGUGGCACGGUUCAA 474      | similar to UniRef100_A7QB21 Cluster: 6,7-dimethyl-8-ribityllumazine synthase; n=1; Vitis vinifera Rep: 6,7-dimethyl-8-ribityllumazine synthase - Vitis vinifera (Grape), partial (71%)                                                                  | Cleavage   | 1                   |
| <a href="#">sbi-MIR171m</a> | <a href="#">TC111734</a> | 3.0             | 22.697                     | miRNA 20 CACUAUAACCGUGCCGAGUU 1<br>::::: : : : : : : : : : :<br>Target 302 GUGGUUGUGGCACGGUUCAA 321      | similar to UniRef100_A7QB21 Cluster: 6,7-dimethyl-8-ribityllumazine synthase; n=1; Vitis vinifera Rep: 6,7-dimethyl-8-ribityllumazine synthase - Vitis vinifera (Grape), partial (82%)                                                                  | Cleavage   | 1                   |
| <a href="#">sbi-MIR171m</a> | <a href="#">CN129969</a> | 3.0             | 22.88                      | miRNA 20 CACUAUAACCGUGCCGAGUU 1<br>::::: : : : : : : : : : :<br>Target 308 GUGGUUGUGGCACGGUUCAA 327      | similar to UniRef100_A7QB21 Cluster: 6,7-dimethyl-8-ribityllumazine synthase; n=1; Vitis vinifera Rep: 6,7-dimethyl-8-ribityllumazine synthase - Vitis vinifera (Grape), partial (82%)                                                                  | Cleavage   | 1                   |

| miRNA Acc.                  | Target Acc.              | Expectation (E) | Target Accessibility (UPE) | Alignment                                                                                                         | Target Description                                                                                                                                                                                                                           | Inhibition | Multiplicity | (d) |
|-----------------------------|--------------------------|-----------------|----------------------------|-------------------------------------------------------------------------------------------------------------------|----------------------------------------------------------------------------------------------------------------------------------------------------------------------------------------------------------------------------------------------|------------|--------------|-----|
| <a href="#">sbi-MIR396f</a> | <a href="#">TC122672</a> | 3.0             | 22.308                     | miRNA 20 GAAGGUGUCGAAAGAACUUG 1<br>: : : : : : : : : : : : : : : : :<br>Target 972 CUUCCUUAUCUUGCUUGAAU 991       | homologue to UniRef100_Q0J367 Cluster: Os09g0252000 protein; n=1; Oryza sativa Japonica Group Rep: Os09g0252000 protein - Oryza sativa subsp. japonica (Rice), partial (70%)                                                                 | Cleavage   | 1            |     |
| <a href="#">sbi-MIR396g</a> | <a href="#">TC125110</a> | 3.0             | 6.339                      | miRNA 21 AAAGGGUGUCGAAAUAACUUG 1<br>: : : : : : : : : : : : : : : : :<br>Target 19 UUUCCACAAAUUUUUUUGAAC 39       | homologue to UniRef100_Q0J6K9 Cluster: Os08g0300200 protein; n=3; Oryza sativa Rep: Os08g0300200 protein - Oryza sativa subsp. japonica (Rice), partial (17%)                                                                                | Cleavage   | 1            |     |
| <a href="#">sbi-MIR396g</a> | <a href="#">CD222706</a> | 3.0             | 21.486                     | miRNA 20 AAGGGUGUCGAAAUAACUUG 1<br>: : : : : : : : : : : : : : : : :<br>Target 329 UUCGAACAGUUUUUAUUGAGC 348      | homologue to UniRef100_Q45W77 Cluster: Ubiquitin carrier protein; n=1; Arachis hypogaea Rep: Ubiquitin carrier protein - Arachis hypogaea (Peanut), partial (95%)                                                                            | Cleavage   | 1            |     |
| <a href="#">sbi-MIR396g</a> | <a href="#">TC114514</a> | 3.0             | 21.486                     | miRNA 20 AAGGGUGUCGAAAUAACUUG 1<br>: : : : : : : : : : : : : : : : :<br>Target 458 UUCGAACAGUUUUUAUUGAGC 477      | homologue to UniRef100_Q45W77 Cluster: Ubiquitin carrier protein; n=1; Arachis hypogaea Rep: Ubiquitin carrier protein - Arachis hypogaea (Peanut), complete                                                                                 | Cleavage   | 1            |     |
| <a href="#">sbi-MIR396h</a> | <a href="#">NP429889</a> | 1.0             | 19.887                     | miRNA 21 GUCAAGUUCUUUCGGACACCU 1<br>: : : : : : : : : : : : : : : : :<br>Target 363 CCGUUCAAGAAAAGCCUGUGGA 383    | GBJAF466199.1 AAL68844.1 putative growth-regulating factor 1 [Sorghum bicolor]                                                                                                                                                               | Cleavage   | 1            |     |
| <a href="#">sbi-MIR396h</a> | <a href="#">TC114909</a> | 1.0             | 20.189                     | miRNA 21 GUCAAGUUCUUUCGGACACCU 1<br>: : : : : : : : : : : : : : : : :<br>Target 599 CCGUUCAAGAAAAGCCUGUGGA 619    | similar to UniRef100_Q9SDZ5 Cluster: Growth-regulating factor 1; n=2; Oryza sativa Rep: Growth-regulating factor 1 - Oryza sativa (Rice), partial (53%)                                                                                      | Cleavage   | 1            |     |
| <a href="#">sbi-MIR396h</a> | <a href="#">CD204209</a> | 3.0             | 23.238                     | miRNA 20 UCAAGUUCUUUCGGACACCU 1<br>.: : : : : : : : : : : : : : : : :<br>Target 137 GGCUCAGGAGAGCUUGUGGA 156      | similar to UniRef100_A7Q5D4 Cluster: Chromosome undetermined scaffold_53, whole genome shotgun sequence; n=1; Vitis vinifera Rep: Chromosome undetermined scaffold_53, whole genome shotgun sequence - Vitis vinifera (Grape), partial (15%) | Cleavage   | 1            |     |
| <a href="#">sbi-MIR396i</a> | <a href="#">TC115103</a> | 2.0             | 12.498                     | miRNA 20 UCAAGUUAUUUCGACACCCU 1<br>: : : : : : : : : : : : : : : : :<br>Target 1788 AGAUCAAUAGAGUUGUGGGA 1807     | similar to UniRef100_Q6Q502 Cluster: Homeodomain leucine zipper protein 16; n=1; Oryza sativa Japonica Group Rep: Homeodomain leucine zipper protein 16 - Oryza sativa subsp. japonica (Rice), partial (60%)                                 | Cleavage   | 1            |     |
| <a href="#">sbi-MIR396i</a> | <a href="#">CD234788</a> | 2.0             | 16.402                     | miRNA 20 UCAAGUUAUUUCGACACCCU 1<br>: : : : : : : : : : : : : : : : :<br>Target 437 AGAUCAAUAGAGUUGUGGGA 456       | weakly similar to UniRef100_Q6Q502 Cluster: Homeodomain leucine zipper protein 16; n=1; Oryza sativa Japonica Group Rep: Homeodomain leucine zipper protein 16 - Oryza sativa subsp. japonica (Rice), partial (17%)                          | Cleavage   | 1            |     |
| <a href="#">sbi-MIR396j</a> | <a href="#">TC115103</a> | 2.0             | 12.498                     | miRNA 20 UCAAGUUAUUUCGACACCCU 1<br>: : : : : : : : : : : : : : : : :<br>Target 1788 AGAUCAAUAGAGUUGUGGGA 1807     | similar to UniRef100_Q6Q502 Cluster: Homeodomain leucine zipper protein 16; n=1; Oryza sativa Japonica Group Rep: Homeodomain leucine zipper protein 16 - Oryza sativa subsp. japonica (Rice), partial (60%)                                 | Cleavage   | 1            |     |
| <a href="#">sbi-MIR396j</a> | <a href="#">CD234788</a> | 2.0             | 16.402                     | miRNA 20 UCAAGUUAUUUCGACACCCU 1<br>: : : : : : : : : : : : : : : : :<br>Target 437 AGAUCAAUAGAGUUGUGGGA 456       | weakly similar to UniRef100_Q6Q502 Cluster: Homeodomain leucine zipper protein 16; n=1; Oryza sativa Japonica Group Rep: Homeodomain leucine zipper protein 16 - Oryza sativa subsp. japonica (Rice), partial (17%)                          | Cleavage   | 1            |     |
| <a href="#">sbi-MIR396k</a> | <a href="#">TC114909</a> | 1.5             | 20.161                     | miRNA 21 CAAGUUCUUUCGGACACCCU 1<br>: : : : : : : : : : : : : : : : :<br>Target 601 GUUCAAGAAAAGCCUGUGGAAA 621     | similar to UniRef100_Q9SDZ5 Cluster: Growth-regulating factor 1; n=2; Oryza sativa Rep: Growth-regulating factor 1 - Oryza sativa (Rice), partial (53%)                                                                                      | Cleavage   | 1            |     |
| <a href="#">sbi-MIR396k</a> | <a href="#">NP429889</a> | 2.5             | 19.787                     | miRNA 21 CAAGUUCUUUCGGACACCCU 1<br>: : : : : : : : : : : : : : : : :<br>Target 365 GUUCAAGAAAAGCCUGUGGAAG 385     | GBJAF466199.1 AAL68844.1 putative growth-regulating factor 1 [Sorghum bicolor]                                                                                                                                                               | Cleavage   | 1            |     |
| <a href="#">sbi-MIR396k</a> | <a href="#">TC121345</a> | 3.0             | 20.539                     | miRNA 22 UCAAGUUCUUUCGGACACCCU 1<br>.: : : : : : : : : : : : : : : : :<br>Target 438 GGUUAAAAGAAAAGCUUGUGAAGA 459 | similar to UniRef100_A7PZJ8 Cluster: Chromosome chr15 scaffold_40, whole genome shotgun sequence; n=1; Vitis vinifera Rep: Chromosome chr15 scaffold_40, whole genome shotgun sequence - Vitis vinifera (Grape), partial (76%)               | Cleavage   | 1            |     |
| <a href="#">sbi-MIR396k</a> | <a href="#">CD207048</a> | 3.0             | 22.213                     | miRNA 21 CAAGUUCUUUCGGACACCCU 1<br>: : : : : : : : : : : : : : : : :<br>Target 323 GUUCAAGAA-GCUUGUGGAGG 342      | similar to UniRef100_Q0IH39 Cluster: LOC779079 protein; n=1; Xenopus laevis Rep: LOC779079 protein - Xenopus laevis (African clawed frog), partial (12%)                                                                                     | Cleavage   | 1            |     |

| miRNA Acc.                  | Target Acc.              | Expectation (E) | Target Accessibility (UPE) | Alignment                                                                | Target Description                                                                                                                                                                                                                             | Inhibition  | (e)<br>Multiplicity |
|-----------------------------|--------------------------|-----------------|----------------------------|--------------------------------------------------------------------------|------------------------------------------------------------------------------------------------------------------------------------------------------------------------------------------------------------------------------------------------|-------------|---------------------|
| <a href="#">sbi-MIR398b</a> | <a href="#">TC130860</a> | 3.0             | 9.938                      | miRNA 20 UACACAAGGGUCAGGCGGGG 1<br>Target 1575 AUGUCUCCCAUCCGCCCA 1594   | UniRef100_P06586 Cluster: Chloroplast 30S ribosomal protein S3; n=4; Andropogoneae Rep: Chloroplast 30S ribosomal protein S3 - Zea mays (Maize), complete                                                                                      | Translation | 1                   |
| <a href="#">sbi-MIR398b</a> | <a href="#">CF480868</a> | 3.0             | 14.56                      | miRNA 20 UACACAAGGGUCAGGCGGGG 1<br>Target 392 CUGUGUUCACAGUCCGCUUC 411   | similar to UniRef100_A7QQL2 Cluster: Chromosome undetermined scaffold_143, whole genome shotgun sequence; n=1; Vitis vinifera Rep: Chromosome undetermined scaffold_143, whole genome shotgun sequence - Vitis vinifera (Grape), partial (18%) | Cleavage    | 1                   |
| <a href="#">sbi-MIR398b</a> | <a href="#">TC113079</a> | 3.0             | 14.848                     | miRNA 20 UACACAAGGGUCAGGCGGGG 1<br>Target 353 CUGUGUUCACAGUCCGCUUC 372   | similar to UniRef100_A7QQL2 Cluster: Chromosome undetermined scaffold_143, whole genome shotgun sequence; n=1; Vitis vinifera Rep: Chromosome undetermined scaffold_143, whole genome shotgun sequence - Vitis vinifera (Grape), partial (73%) | Cleavage    | 1                   |
| <a href="#">sbi-MIR398b</a> | <a href="#">BG158064</a> | 3.0             | 19.165                     | miRNA 20 UACACAAGGGUCAGGCGGGG 1<br>Target 266 GUCUGUUCCAGUUUGCCCC 285    | similar to UniRef100_Q641B1 Cluster: MGC83343 protein; n=1; Xenopus laevis Rep: MGC83343 protein - Xenopus laevis (African clawed frog), partial (6%)                                                                                          | Cleavage    | 1                   |
| <a href="#">sbi-MIR444a</a> | <a href="#">TC127476</a> | 0.5             | 16.5                       | miRNA 21 UUCGAACUCUGUUGUUGACGU 1<br>Target 440 AAGCUUGAGGCAACAACUGCA 460 | similar to UniRef100_Q6Z6W2 Cluster: MADS-box transcription factor 57; n=2; Oryza sativa Japonica Group Rep: MADS-box transcription factor 57 - Oryza sativa subsp. japonica (Rice), partial (44%)                                             | Cleavage    | 1                   |
| <a href="#">sbi-MIR444a</a> | <a href="#">TC125842</a> | 2.0             | 18.582                     | miRNA 21 UUCGAACUCUGUUGUUGACGU 1<br>Target 43 GAGCCUGAGGCAACAGCUGCA 63   | similar to UniRef100_Q84SC7 Cluster: Zinc finger (C3HC4-type RING finger) protein-like; n=1; Oryza sativa Japonica Group Rep: Zinc finger (C3HC4-type RING finger) protein-like - Oryza sativa subsp. japonica (Rice), partial (14%)           | Cleavage    | 1                   |
| <a href="#">sbi-MIR444a</a> | <a href="#">CD225619</a> | 3.0             | 18.11                      | miRNA 21 UUCGAACUCUGUUGUUGACGU 1<br>Target 112 AAGCAUGAGGCAGGAACUGCA 132 | UniRef100_Q6Z6W2 Cluster: MADS-box transcription factor 57; n=2; Oryza sativa Japonica Group Rep: MADS-box transcription factor 57 - Oryza sativa subsp. japonica (Rice), partial (8%)                                                         | Cleavage    | 1                   |
| <a href="#">sbi-MIR444a</a> | <a href="#">TC124738</a> | 3.0             | 18.565                     | miRNA 21 UUCGAACUCUGUUGUUGACGU 1<br>Target 162 AGGCUUGAGACACAAAUGCA 182  | similar to UniRef100_Q0JAY4 Cluster: Os04g0568400 protein; n=2; Oryza sativa Japonica Group Rep: Os04g0568400 protein - Oryza sativa subsp. japonica (Rice), partial (41%)                                                                     | Translation | 1                   |
| <a href="#">sbi-MIR444a</a> | <a href="#">TC128293</a> | 3.0             | 19.373                     | miRNA 21 UUCGAACUCUGUUGUUGACGU 1<br>Target 107 AAGCAUGAGGCAGGAACUGCA 127 |                                                                                                                                                                                                                                                | Cleavage    | 1                   |
| <a href="#">sbi-MIR444b</a> | <a href="#">TC127476</a> | 0.5             | 18.61                      | miRNA 21 CCGUCGUUCGAACUCUGUUGU 1<br>Target 434 GGCAGCAAGCUUGAGGCAACA 454 | similar to UniRef100_Q6Z6W2 Cluster: MADS-box transcription factor 57; n=2; Oryza sativa Japonica Group Rep: MADS-box transcription factor 57 - Oryza sativa subsp. japonica (Rice), partial (44%)                                             | Cleavage    | 1                   |
| <a href="#">sbi-MIR444b</a> | <a href="#">TC120067</a> | 2.0             | 19.722                     | miRNA 20 CGUCGUUCGAACUCUGUUGU 1<br>Target 72 GCAGUAAGUUUGAGACAAUG 91     | similar to UniRef100_Q0E0H6 Cluster: Os02g0550900 protein; n=1; Oryza sativa Japonica Group Rep: Os02g0550900 protein - Oryza sativa subsp. japonica (Rice), partial (20%)                                                                     | Cleavage    | 1                   |
| <a href="#">sbi-MIR444b</a> | <a href="#">TC119833</a> | 3.0             | 13.879                     | miRNA 20 CGUCGUUCGAACUCUGUUGU 1<br>Target 299 GAAGCAAGGUUGAGAUAAUA 318   | homologue to UniRef100_Q23813 Cluster: Ferredoxin-sulfite reductase precursor; n=1; Zea mays Rep: Ferredoxin-sulfite reductase precursor - Zea mays (Maize), partial (57%)                                                                     | Cleavage    | 1                   |
| <a href="#">sbi-MIR444c</a> | <a href="#">TC127476</a> | 0.0             | 19.83                      | miRNA 21 GUUGAACGUUCUUUCGGUGUU 1<br>Target 461 CAACUUGCAAGAAAGCCACAA 481 | similar to UniRef100_Q6Z6W2 Cluster: MADS-box transcription factor 57; n=2; Oryza sativa Japonica Group Rep: MADS-box transcription factor 57 - Oryza sativa subsp. japonica (Rice), partial (44%)                                             | Cleavage    | 1                   |
| <a href="#">sbi-MIR444c</a> | <a href="#">TC117076</a> | 2.0             | 18.854                     | miRNA 21 GUUGAACGUUCUUUCGGUGUU 1<br>Target 1103 CAACUUGCAAGAGCUACAA 1123 | homologue to UniRef100_Q9XHR2 Cluster: Eukaryotic translation initiation factor 3 subunit A; n=1; Zea mays Rep: Eukaryotic translation initiation factor 3 subunit A - Zea mays (Maize), partial (60%)                                         | Translation | 1                   |

**Supplemental Table 1: miRNAs expression in differen**

| miRNA Family | Target Gene Acc. | Gene Synonym | Callus | Embryo | Leaf | Ovary | Panicle |
|--------------|------------------|--------------|--------|--------|------|-------|---------|
| sbi-MIR156j  | BG947367         | Sb02g029300  |        |        |      |       |         |
| sbi-MIR156j  | EH409419         | Sb01g038620  |        |        |      |       |         |
| sbi-MIR156j  | CF756128         | Sb01g027940  |        |        |      |       |         |
| sbi-MIR156k  | BG947367         | Sb02g029300  |        |        |      |       |         |
| sbi-MIR156k  | CF756053         | Sb01g027940  |        |        |      |       |         |
| sbi-MIR156l  | BG947367         | Sb02g029300  |        |        |      |       |         |
| sbi-MIR156m  | BG948102         | Sb09g004120  |        |        |      |       |         |
| sbi-MIR156m  | BM325400         | Sb04g033230  |        |        |      |       |         |
| sbi-MIR166m  | CF074035         | Sb08g005200  |        |        |      |       |         |
| sbi-MIR166o  | CF074035         | Sb08g005200  |        |        |      |       |         |
| sbi-MIR166p  | CF074035         | Sb08g005200  |        |        |      |       |         |
| sbi-MIR166q  | CF074035         | Sb08g005200  |        |        |      |       |         |
| sbi-MIR166r  | CF074035         | Sb08g005200  |        |        |      |       |         |
| sbi-MIR167j  | CX614408         | Sb04g033320  |        |        |      |       |         |
| sbi-MIR167k  | CD423596         | Sb08g021460  |        |        |      |       |         |
| sbi-MIR168c  | CD209773         | Sb04g030860  |        |        |      |       |         |
| sbi-MIR171l  | CN129969         | Sb06g031050  |        |        |      |       |         |
| sbi-MIR171l  | CN142205         | Sb06g031050  |        |        |      |       |         |
| sbi-MIR171l  | AW747132         | Sb06g031050  |        |        |      |       |         |
| sbi-MIR171l  | CN131513         | Sb06g031050  |        |        |      |       |         |
| sbi-MIR171   | CN131513         | Sb06g031050  |        |        |      |       |         |
| sbi-MIR171m  | CN129969         | Sb06g031050  |        |        |      |       |         |
| sbi-MIR171m  | BM317608         | Sb06g031050  |        |        |      |       |         |
| sbi-MIR390b  | BE363723         | Sb08g002760  |        |        |      |       |         |
| sbi-MIR396f  | CF480198         | Sb09g022550  |        |        |      |       |         |
| sbi-MIR396g  | CB927788         | NTMC2T2.2    |        |        |      |       |         |
| sbi-MIR396h  | CD204209         | Sb09g019370  |        |        |      |       |         |
| sbi-MIR396k  | AW676947         | Sb04g034800  |        |        |      |       |         |
| sbi-MIR396k  | BM329506         | Sb10g004460  |        |        |      |       |         |
| sbi-MIR398b  | CF480868         | Sb08g001790  |        |        |      |       |         |
| sbi-MIR398b  | CF487358         | Sb08g001790  |        |        |      |       |         |
| sbi-MIR444a  | CD224118         | Sb03g012810  |        |        |      |       |         |
| sbi-MIR444a  | CN125113         | Sb06g025690  |        |        |      |       |         |
| sbi-MIR444b  | AW564049         | Sb09g024840  |        |        |      |       |         |
| sbi-MIR444c  | BM325378         | Sb03g007840  |        |        |      |       |         |

\*Transcript per million (TPM)

t tissues and developmental stages

| Pollen | Root | Shoot | TPM*            | Gene EST | Total EST in Pool     |
|--------|------|-------|-----------------|----------|-----------------------|
|        |      |       | 206             | 2        | 9689                  |
|        |      |       | 218/55          | 2/1      | 9137/17945            |
|        |      |       | 221             | 2        | 26                    |
|        |      |       | 206             | 2        | 9689                  |
|        |      |       | 221             | 2        | 9026                  |
|        |      |       | 206             | 2        | 9689                  |
|        |      |       | 232/55          | 2/1      | 8617/17945            |
|        |      |       | 103/218/232     | 2/2/2/   | 19261/9137/8617       |
|        |      |       | 188             | 2        | 10613                 |
|        |      |       | 188             | 2        | 10613                 |
|        |      |       | 188             | 2        | 10613                 |
|        |      |       | 188             | 2        | 10613                 |
|        |      |       | 188             | 2        | 10613                 |
|        |      |       | 111/659         | 2/7/     | 17945/10613           |
|        |      |       | 218/232/55      | 2/2/1    | 9137/8617/17945       |
|        |      |       | 103             | 2        | 19261                 |
|        |      |       | 155/218/221/501 | 3/2/2/9  | 19261/9137/9026/17945 |
|        |      |       | 155/218/221/501 | 3/2/2/9  | 19261/9137/9026/17945 |
|        |      |       | 155/218/221/501 | 3/2/2/9  | 19261/9137/9026/17945 |
|        |      |       | 155/218/221/501 | 3/2/2/9  | 19261/9137/9026/17945 |
|        |      |       | 155/218/221/501 | 3/2/2/9  | 19261/9137/9026/17945 |
|        |      |       | 155/218/221/501 | 3/2/2/9  | 19261/9137/9026/17945 |
|        |      |       | 155/218/221/501 | 3/2/2/9  | 19261/9137/9026/17945 |
|        |      |       | 218             | 2        | 9137                  |
|        |      |       | 103/221         | 2/2      | 19261/9026            |
|        |      |       | 155/464/111     | 3/4/2    | 19261/8617/17945      |
|        |      |       | 103             | 2        | 19261                 |
|        |      |       | 55              | 1        | 17945                 |
|        |      |       | 259/221/55      | 5/2/1    | 19261/9026/17945      |
|        |      |       | 664/111         | 6/2/     | 9026/17945            |
|        |      |       | 664/111         | 6/2/     | 9026/17945            |
|        |      |       | 206/328         | 2/3      | 9689/9137             |
|        |      |       | 231/218/111     | 2/2/2/   | 4648/9137/17945       |
|        |      |       | 309/578/726/110 | 3/5/14/1 | 9689/8648/19261/9026  |
|        |      |       | 51/109          | 1/1/     | 19261/9137            |
